# Supplementary material for: Detection and discovery of plant viruses in soybean by metagenomic sequencing
Source: Springer Nature journal article supplement (doi:10.1186/s12985-022-01872-5), 2022-09-13
Supplement: MOESM3 [file 23481840]

**Figure S3** Pairwise alignment of the full-length genome sequences of CIYVV IA-2016 and CIYVV IA-2017 identified in this study following RNA sequencing and assembly.

```

CIYVV-IA-2016      GATAATCAACTCCAAAATGGGAAAAATATAAAATCAATACAAGACAAATACAGACAAAGC
CIYVV-IA-2017      -----GACAAATACAGACAAAGC
                      *****

CIYVV-IA-2016      AATCAAACCTCTCGAATTTTCAAGCATTCAAGCAAGTTCACACAAACGAAGCAAAGTAAGC
CIYVV-IA-2017      AATCAAACCTCTCGAATTTTCAAGCATTCAAGCAAGTTCACACAAACGAAGCAAAGTAAGC
                      *****

CIYVV-IA-2016      CAACAATCTTCTGTAAAATCACTTCAGTTTCGCATTTCTTTAATTTTATTTGCAATCTCT
CIYVV-IA-2017      CAACAATTTTCTGTAAAGATCACTTCAGTTTCGCATTTCTTTAATTTTATTTGCAATCTCT
                      *****

CIYVV-IA-2016      TATTTGTAATTTTAGTATAATTTTATATAAGCAATGGCACAAAGTTATGATTGGAAGCATC
CIYVV-IA-2017      TATTTGTAATTTTAGTATAATTTTATATAAGCAATGGCACAAATTTATGATTGGAAGCATT
                      *****

CIYVV-IA-2016      ATGGTTCCTTAAACAAGGAATCTAAAGTTTCTGAAACTAATATAAGTACTAGTAGTAAT
CIYVV-IA-2017      ATGGTTCCTTAAACAAGGAATCTAAAGTTTCTGAAACTAATATAAGTACTAGTAGTAAT
                      *****

CIYVV-IA-2016      ATTCCTAAAACAAAAACCAGCACTCACATCGAGGCTGGACCCAAAAACATGTCTTTTAAC
CIYVV-IA-2017      ATTCCTAAAACAAAAACCAGCACTCACATCGAGGCTGGACCCAAAAACATGTCTTTTAAC
                      *****

CIYVV-IA-2016      TTACAACCAACCCTGATCCATTCAAAGCGATAACTCTAGCTTGCAAAGAAAGAGTTGCA
CIYVV-IA-2017      TTACAACCAACCCTGATCCATTCAAAGCAATAACTCTAGCTTGCAAAGAAAGAGTTGCA
                      *****

CIYVV-IA-2016      AAGTTTGGTGACATGGTCTTTAAGACTAGAAGAGGCATCACCACAATGGTGCCAAAACCA
CIYVV-IA-2017      AAGTTTGGTGACATGGTCTTTAAGACTAGAAGAGGCATCACCACAATGGTGCCAAAACCA
                      *****

CIYVV-IA-2016      GCACGCTTGGTTGAGGAGGAAAAGAGAGCAGCTGAAGCTCTAAAGCGATTGATGGAAGTG
CIYVV-IA-2017      GCACGCTTGGTTGAGGAGGAAAAGAGAGCAGCTGAAGCTCTAAAGCGATTGATGGAAGTG
                      *****

CIYVV-IA-2016      GAGTGGACTCTGGAAGAAATTGATCCTGATGCTGAATACCAAGTGCCAGATTTAAGACAG
CIYVV-IA-2017      GAGTGGACTCTGGAAGAAATTGATCCTGACGCTGAATACCAAGTGCCAGACTTAAGACAG
                      *****

CIYVV-IA-2016      AGGGGTTCCTCAAGTGTCAATTTAAGAGTCATTACCACAAGAGGACTCCAAAAATAGCAAAG
CIYVV-IA-2017      AGGGGTTCCTCAAGTGTCAATTTAAGAGTCCTTACCACAAGAAGACTCCAAAAATAGCAAAG
                      *****

CIYVV-IA-2016      AAATTTAAAGTGGTTAAGCCAGTGAAGGGAACAAGAAAATTCAGCATGTAACAAATGCA
CIYVV-IA-2017      AAATTTAAAGTGGTTAAGCCAGTGAAGGGAACAAGAAAATTCAGCATGTAACAAATGCA
                      *****

CIYVV-IA-2016      CTGCTCAAGATTGTTAAGAATAACAATCTAGTTCCTGAAGTTGCTGACAGAAATAAGAAA
CIYVV-IA-2017      CTGCTCAAGATTGTTAAGAAATAACAATCTAGTTCCTGAAGTTGCTGACAGAAATAAGAAA
                      *****

CIYVV-IA-2016      GCAAATCATGCAACTTTCTCAAAAATATGGCTCAACTTATGGCATGCACATAATTGTTAAC
CIYVV-IA-2017      GCAAATCAGCAACTTTCTCAAAAATATGGCTCAACTTATGGCATGCACATAATTGTTAAC
                      *****

CIYVV-IA-2016      CATATGGTTCGAAAGAGACGCTCAGTTGATGTGCGACTTAATGGTCTCATGACAAGCATT
CIYVV-IA-2017      CATATGGTTCGAAAGAGACGTTTCAAGTTGATGTGCGACTCAATGGTCTCATGACAAGCATT
                      *****

```

CLYVV-IA-2016 GCAAAGCAGGAAGCAATTGGATTTGAAAAGTTGAATGTTAGCACATTAAGAGAGGGGCAC  
CLYVV-IA-2017 GCAAAGCAGGAAGCAATTGGATTTGAAAAGTTGAATGTTAGCACATTAAGAGAGGGGCAC  
\*\*\*\*\*

CLYVV-IA-2016 AGTGGACTTGTGTTGCAAACCAAACAGTCCCAAAGTCCCACTTCAATAATGATGACATA  
CLYVV-IA-2017 AGTGGACTAGTGTGCAAACCAAACAGTCCCAAAGTCCCACTTCAATAATGATGACATA  
\*\*\*\*\*

CLYVV-IA-2016 ACAATTGTGAGAGGTGTAATAAAGAGTCATGGAATACCTTGCTTAGTAGATGCTAGACAG  
CLYVV-IA-2017 ACAATTGTGAGAGGTGTAATAAAGAGTCATGGAATACCTTGCTTAGTAGATGCTAGACAG  
\*\*\*\*\*

CLYVV-IA-2016 AATTTGAATCATCAGCAACTTAGTAGGATAAGGGAATTCTCTGCAGGAGATCTGTTTGG  
CLYVV-IA-2017 AGTTTGAATTATCAACAACAGTAGGATAAGGGAATTCTCTGCAGGAGATCTATTTGG  
\* \*\*\*\*\*

CLYVV-IA-2016 AAAGGATACAATCAGACTTTCATAGATAATAGACCAAAGACATTGGACACACATGTACA  
CLYVV-IA-2017 AAAGGATACAATCAGACTTTTATAGATAATAGACCAAAGACATTGGACACACATGTACA  
\*\*\*\*\*

CLYVV-IA-2016 TCTGATCTAAACGTAGTCCAATGTGGTTCGCGTATGGCGTTAATGACTCTGGCACTATTC  
CLYVV-IA-2017 TCTGATCTAACGTAGTCCAATGTGGTTCGCGTATGGCGTTGATGACTCTGGCACTATTC  
\*\*\*\*\*

CLYVV-IA-2016 CCGTGTGGAAGAATCAGTTCGAAAGAATGTGTGGAGGATTTTCATAATCAGAACAATAGA  
CLYVV-IA-2017 CCGTGTGGAAGAATCAGTTCGAAAGAATGTGTGGAGGATTTTCATAATCAGAACAATAGG  
\*\*\*\*\*

CLYVV-IA-2016 GAGAGATATGCAAGAACAGAAAGATTCTTAAGCCAGGCAATGACTCTCCTAGCACAAACA  
CLYVV-IA-2017 GAGAGATATGCAAGAACAGAAAGATTCTTAAGCCAGGCAATGACTCTCCTAGCACAAACA  
\*\*\*\*\*

CLYVV-IA-2016 TACCCAGAATTCAAACACTCAGGAGACATCTTGCAATTATTTTCGTGAGCGTTTGAGTATG  
CLYVV-IA-2017 TACCCAGAATTCAAACACTCAAGAGACATCTTGCAATTATTTTCGTGAGCGTTTGAGTATG  
\*\*\*\*\*

CLYVV-IA-2016 GAAAACTCAAATGCAGAGGCTGTGTTGAGACAAACAAAGCCATAACATCACTTACAGAG  
CLYVV-IA-2017 GAAAACTCAAATGCAGAGGCTGTGTTGAGACAAACAAAGCCATAACATCACTTACAGAG  
\*\*\*\*\*

CLYVV-IA-2016 ACTCCATTTAATCACATAAGGAAGATAAATGAGGTGCTTATAAGATATGGTAGTTTAAACA  
CLYVV-IA-2017 ACTCCATTTAATCACATAAGGAAGATAAATGAGGTGCTTATAAGATATGGTAGTTTAAACA  
\*\*\*\*\*

CLYVV-IA-2016 AATGATGAAGTGGGGTTGCAAGTGCAGCTTACTTGAAATTACTAGGTACATTCGAAAC  
CLYVV-IA-2017 AATGATGAAGTGGGGTTGCAAGTGCAGCTTACTTGAAATTACTAGGTACATTCGAAAC  
\*\*\*\*\*

CLYVV-IA-2016 AGAACTGATTCCATCCAAAGGAATGACCTAAGTAAGTTCAGAAACAAGATTTCTTCAAAG  
CLYVV-IA-2017 AGAACTGATTCCATCCAAAGGAATGACCTAAGTAAGTTCAGAAACAAGATTTCTTCAAAG  
\*\*\*\*\*

CLYVV-IA-2016 ACACACATCAACTTAGATTTGATGTGTGATAACCAACTTGACAAAAATGCAAACCTTCATG  
CLYVV-IA-2017 ACACACATCAACTTAGATTTGATGTGTGATAACCAACTTGACAAAAATGCAAACCTTCATG  
\*\*\*\*\*

CLYVV-IA-2016 TGGGGTCAGAGAGCATACCATGCAAAACGATTTTTGTCGAATTATTTTCAGTGTGATTGAT  
CLYVV-IA-2017 TGGGGTCAGAGAGCATATCATGCAAAACGATTTTTGTCGAATTATTTTCAGTGTGATTGAT  
\*\*\*\*\*

CLYVV-IA-2016 CCATCTGAAGGTTACGATAAATTCATCAAGAGAAAGCTACCCAATGGTACAAGAGAACTT  
CLYVV-IA-2017 CCATCTGAAGGTTATGACAAATTCATCAAGAGAAAGCTACCCAATGGTACAAGAGAACTT  
\*\*\*\*\*

C1YVV-IA-2016 GCAACTGGTAGGTTGATCGTTCCTACAACTTTGAATCTTTTAGAGATCAGATGAAAGGA  
C1YVV-IA-2017 GCAACTGGCAGGTTGATCGTTCCTACAACTTTGAATCTTTTAGAGATCAAATGAAAGGA  
\*\*\*\*\*

C1YVV-IA-2016 ACCATGGTGGACAATAGACCAATTGGCAAGGAATGTGTTTCGCGTGTAAAAGGAGCCTTT  
C1YVV-IA-2017 ACCATGGTGGACAATAGACCAATTGGCAAGGAATGTGTTTCGCGTGTAAAAGGAGCCTTT  
\*\*\*\*\*

C1YVV-IA-2016 TGTTACCCGTGCTGTTGCACAACCTGATGATATTGGCAATGCAATTTTGTCTGAATTTAAA  
C1YVV-IA-2017 TGTTACCCGTGCTGTTGCACAACCTGATGATATTGGCAATGCAATTTTGTCTGAGTTAAA  
\*\*\*\*\*

C1YVV-IA-2016 ATGCCAACAAAATATCATTTAGTTCTTGGTGGTCAGGAAGCAGCGAAATACATAGAGTTA  
C1YVV-IA-2017 ATGCCAACAAAATATCATTTAGTTCTTGGTGGCCAGGAAGCAGCGAAATACATAGAGTTA  
\*\*\*\*\*

C1YVV-IA-2016 CCATCAGATAGCAGTGGTATGATGTACATAGCGAAAGACGGATATTGCCATATCAATATA  
C1YVV-IA-2017 CCATCAGATAGCAGTGGCATGATGTACATAGCAAAAGATGGATATTGCCATATCAATATA  
\*\*\*\*\*

C1YVV-IA-2016 TTCTTTGCTATGTTGGTGAATGTGTGAGAAAGATAAATCAAAGGATTTCAACAAAATGGTG  
C1YVV-IA-2017 TTCTTTGCTATGTTGGTGAATGTGTGAGAAAGATAAATCAAAGGACTTCACTAAAATGGTG  
\*\*\*\*\*

C1YVV-IA-2016 CGGGATCAGATAATGCCGAAGCTAGGTCAGTGGCCAACGATGCTAGATGTTGCAACAGCG  
C1YVV-IA-2017 CGGGATCAGATAATGCCGAAGCTAGGTCAGTGGCCAACAATGCTAGATGTTGCAACAGCA  
\*\*\*\*\*

C1YVV-IA-2016 TGTTGGTACTTAACAGTTTGGTTTCCCTGATACACTTAGTGCTGAACTTCCGAGAATACTT  
C1YVV-IA-2017 TGTTGGTACTTAACAGTTTGGTTTCCCTGATACACTTAGTGCTGAACTTCCAAGAATACTT  
\*\*\*\*\*

C1YVV-IA-2016 GTGGATCACAAGCTAAGCACCATGCATGTTCTAGATTTCATATGGTTCTATAAGCACAGGA  
C1YVV-IA-2017 GTGGATCACAAGCTTAAACACCATGCATGTTCTAGATTTCATATGGTTTCGATAAGCACAGGA  
\*\*\*\*\*

C1YVV-IA-2016 TATCATGTTCTCAAGGCAAATATTGTTTCCCAATTAATCAAGTTTGCTAGTGATGATCTT  
C1YVV-IA-2017 TATCATGTTCTCAAGGCAAATATTGTTTCTCAATTGATCAAGTTTGCTAGTGATGATCTT  
\*\*\*\*\*

C1YVV-IA-2016 GAGTCAGATTTGAAATTTACAGAGTTGGTGGCAAATCATTGACAGGGCAGGTGATACAG  
C1YVV-IA-2017 GAGTCAGATTTGAAATTTACAGAGTTGGTGGCAAATCATTGACAGGGCAGGTGATACAG  
\*\*\*\*\*

C1YVV-IA-2016 TTTGACACAAAATGTTAATCTCAAGTATTTACCGGCCAAGACAGATGGAGAGGATCATC  
C1YVV-IA-2017 TTTGACACAAAATGTTAATCTCAAGTATTTACCGACCAAGACAGATGGAGAGGATCATC  
\*\*\*\*\*

C1YVV-IA-2016 AATGAAGAACCTTTTGTGCTAGTTCTAGCAATGCAATCACCATCAGTTCTTTTAGCCTTG  
C1YVV-IA-2017 AATGAAGAGCCCTTTTGTGCTAGTTCTAGCAATGCAATCACCATCAGTTCTTTTAGCCTTG  
\*\*\*\*\*

C1YVV-IA-2016 TTCAATAGTGCTTCGCTAGAGAAAGCCGTGGAGGTCTGGCTACACAAGGACATGCGCGTT  
C1YVV-IA-2017 TTCAATAGTGCTTCGCTAGAGAAAGCCGTGGAGGTCTGGCTGCACAAGGACATGCGCGTT  
\*\*\*\*\*

C1YVV-IA-2016 TCACATGTGATGACAATGCTTGCCCTCCTGGCAGCAAAAGTAAGTGCAGCCAAGATGGTG  
C1YVV-IA-2017 TCACATGTGATGACAATGCTTGCCCTCCTGGCAGCAAAAGTAAGTGCAGCCAAGATGGTG  
\*\*\*\*\*

CLYVV-IA-2016 AATTTACAGATGGAGATAATAGAAGCTAGCGCTAGCCACTTTCTTGCTGCAATGGACACC  
CLYVV-IA-2017 AATTTACAGATGGAGATAATAGAAGCTAGTGCTAGCCACTTTCTCGCTGCAATGGACACC  
\*\*\*\*\*

CLYVV-IA-2016 ATTCACAAGCCAATGCATTCCATTAACACAGCAAACATTTTCTTGATGAACCTAGAAGAA  
CLYVV-IA-2017 ATTCACAAGCCAATGCATTCCATCAACACAGCGAATATTTTCTTGATGAACCTAGAAGAA  
\*\*\*\*\*

CLYVV-IA-2016 GGGAGATCAACTGATAGAACAATTGATGAACTTGGTTTTTCACTTTGAAAAAGTCTAGC  
CLYVV-IA-2017 GGGAGATCAACTGACAGAACAATTGACGAACTTGGGTTCACCTTTGAAAAAGTCTAGC  
\*\*\*\*\*

CLYVV-IA-2016 CAGGTACTCATGGAAAAATCTGGGCAGAGGATTTAGAGCAGCAATGGCTAGGTTTAAAG  
CLYVV-IA-2017 CAAGTACTCATGGAAAAATCTGGGCAGAGGATTTAGAGCAGCAATGGCTAGGTTTAAAG  
\*\* \*\*\*\*\*

CLYVV-IA-2016 TTGTCCAAAAAGTTTTATTTAATAAGGCAGTCATGGAAGCAGCGGGCAAAGTATCCAAA  
CLYVV-IA-2017 TTGTCCAAAAAGTTTTATTTAATAAGGCAGTCATGGAAGCAGCGGGCAAAGTATCCAAA  
\*\*\*\*\*

CLYVV-IA-2016 ATATTAGCCCAGAGAGACGAGCTAGGTGCCAGCGACAATTCAGCGCATCACTCAGATTG  
CLYVV-IA-2017 ATACTAGCCCAGAGAGACGAGCTAGGTGTCAGCGACAAGTTCAGCGCATCACTCAGATTG  
\*\*\* \*\*\*\*\*

CLYVV-IA-2016 TCAGCAACAAGCATCAAAAATCAAGCAATCAGTTGCAGGAAGAGAATGGTCGCAACAAGT  
CLYVV-IA-2017 TCAGTAACAAGCGTCAAGAATCAAGCAATCAGTTGTAGGAAGAGAATGGTCGCAACAAGT  
\*\*\*\* \*\*\*\*\*

CLYVV-IA-2016 AAGAAGTGTGGTTTCAGTGTGCAGAAAATGGTAGCAATGCAAGCCTTAAGGGTGTTCAAA  
CLYVV-IA-2017 AAGAAGTGTGGTTTCAGTGTGCAGAGAATGGTAGCAATGCAAGCATTAAAGGTGTTCAAA  
\*\*\*\*\*

CLYVV-IA-2016 CGATGCATGAGTAATATGGTGGATGTTCTCAACGTGTAGCAACAATAACACTCCTGATG  
CLYVV-IA-2017 CGATGCATGAGAAATATGGTGGATGTTCTCAACGTGTAGCAGCAATAACACTCCTGATG  
\*\*\*\*\*

CLYVV-IA-2016 GGTATCCTGAGTCAAGTGAGATCCCACATCAAAACTGTCACATCGTACAAGCGCGTTTCA  
CLYVV-IA-2017 GGCATCCTGAGCCAAGTGAGATCCCACATCAAAACTGTTACATCGTACAAGCGCGTTTCA  
\*\* \*\*\*\*\*

CLYVV-IA-2016 AAGGAAGCAAAAGTTCAAGATGACTTGTACAGAATCAATGAGTATTACGAGTTGTTGAAA  
CLYVV-IA-2017 AAGGAAGCAAAAGTTCAAGATGACTTGTACAGAATCAATGAGTATTATGAGTTGTTGAAA  
\*\*\*\*\*

CLYVV-IA-2016 GCTCGTGATAGGTACACAGTGGATGAGTTTCGAGTAAACTGGAATCACTAAACCCAGAA  
CLYVV-IA-2017 GCTCGTGATAGGTATACAGTAGATGAGTTCGAGTAAAGCTGGAATCATTGAACCCAGAA  
\*\*\*\*\*

CLYVV-IA-2016 CTCCTAGAGACTTTTGTGAGTACTACAAGGAACCAAGTGGTTTGTGATGGAGTCCAAG  
CLYVV-IA-2017 CTCCTAGAGACTTTTGTGAGTACTACAAGGAACCAAGTGGTTTGTGATGGAGTCCAAG  
\*\*\*\*\*

CLYVV-IA-2016 TCAAAATGATATGGTAGCTCTTGAGAAAGTAGTGGCTTTTACAGCACTAGTCATGATGATA  
CLYVV-IA-2017 TCAAAATGACATGGTTGCTCTTGAGAAAGTAGTGGCTTTTACAGCGCTAGTCATGATGATA  
\*\*\*\*\*

CLYVV-IA-2016 TTTGATGGAGAGAGGAGTGATTGCGTCTACAAAATACTGAACAAGCTCAAAGGTATAATC  
CLYVV-IA-2017 TTTGATGGAGAGAGGAGTGATTGTTGCTACAAAATACTGAACAAGCTCAAAGGTATAATC  
\*\*\*\*\*

CLYVV-IA-2016 TCAACAACAACCTCAGGATGGCTACAAATTTCAAAGTCTTGATGACATTAACCCATGTTG  
CLYVV-IA-2017 TCAACAACAACCTCAAGATGGTTACAAATTTCAAGTCTTGATGACATTAACCCATGTTG  
\*\*\*\*\*

CLYVV-IA-2016 GAAGATAAAAAGGGTGTATTGATTTTGAGATTGATGAGGGTGACAGCAAGATAATATGC  
CLYVV-IA-2017 GAAGACAAGAAGGGTGTATTGATTTTGAGATTGATGAGGGTGATAGCAAGATAATATGC  
\*\*\*\*\* \* \* \*\*\*\*\*

CLYVV-IA-2016 AGCAACCAGACAACATTCGTTTCAGTGGTGGGATAATCAACTCCAAAATGGGAATGTCATC  
CLYVV-IA-2017 AGCAACCAACAACGTTTCGTTTCAGTGGTGGGATAATCAACTCCAAAATGGGAATGTCATT  
\*\*\*\*\* \* \* \*\*\*\*\*

CLYVV-IA-2016 ACACACTATAGAACAGAAGGCCATTTTCATGGAATTCACCAGAGAGACAGCACAAGAGGTT  
CLYVV-IA-2017 ACACACTATAGAACAGAAGGCCATTTTCATGGAATTCACCAGAGAGACAGCACAAGAAGTT  
\*\*\*\*\* \* \* \*\*\*\*\*

CLYVV-IA-2016 GCGCATACGATAGCCACACGCGATTTTAAAGACATCTTAGTTAGAGGGGCTGTTGGATCG  
CLYVV-IA-2017 GCACATACGATAGCCACAGTGATTTTAAAGACATCTTAGTTAGAGGGGCTGTTGGATCG  
\*\* \*\*\*\*\*

CLYVV-IA-2016 GGAAAATCAACTGGTTTACCATCATACTTAGTGAGAAGGGGAAGGTGTTGATGCTGGAG  
CLYVV-IA-2017 GGAAAATCAACTGGTTTACCATCATACTTAGTGAGAAGGGGAAGGTGTTGATGCTGGAA  
\*\*\*\*\*

CLYVV-IA-2016 TCAACAAGACCATTAGCAGAAAATGTATTCAAGCAGCTCAAGAGCGATCCCTTCTACAAA  
CLYVV-IA-2017 TCAACAAGACCATTAGCAGAAAATGTATTCAAGCAGCTCAAGAGTGATCCCTTCTACAAA  
\*\*\*\*\* \* \* \*\*\*\*\*

CLYVV-IA-2016 AACCACAACACTCCGCATGAGAGGGACAACGAGTTATGGTTCAACACCTATTACGATCATG  
CLYVV-IA-2017 AACCAGCACTTCGCATGAGAGGAACAACGAGTTACGGCTCAACACCTATCAGATCATG  
\*\*\*\*\* \* \* \*\*\*\*\*

CLYVV-IA-2016 ACAAGTGGTTTTGCGCTCCATTTTTATGCAAACAATCCCAGTTACTGAAGGAGTTTCAA  
CLYVV-IA-2017 ACAAGTGGTTTTGCACTTCATTTCTATGCAAACAATCCTCAGTTACTGAAGGAATTCAA  
\*\*\*\*\* \* \* \*\*\*\*\*

CLYVV-IA-2016 TTCATTATCATAGATGAGTGTCTGTTCTGGATGCCAATGCGATTGCATTTGTCAGCCTG  
CLYVV-IA-2017 TTCATTATCATAGATGAGTGCATGTTCTGGATGCTAATGCAATGCATTTGTCAGCCTG  
\*\*\*\*\* \* \* \*\*\*\*\*

CLYVV-IA-2016 CTCAAGGAGTTCTCATTTCAGGGGAACTTGTCAAAGCATCAGCAACACCACCAGGGAGA  
CLYVV-IA-2017 CTCAAGGAATTTTCATTTCAGGGGAACTTGTCAAAGCATCAGCAACACCACCAGGGAGA  
\*\*\*\*\* \* \* \*\*\*\*\*

CLYVV-IA-2016 GAAACTGAATTCACAACACAACACAAGGTGTCATTGGTTACGCAAGACCAACTTTCTTTT  
CLYVV-IA-2017 GAAACTGAATTCACAACACAACACAAGGTGTCATTAGTCACGCAAGACCAACTTTCTATT  
\*\*\*\*\* \* \* \*\*\*\*\*

CLYVV-IA-2016 GACCAATTTGTGGCCAGCAAGGTACAGGTTCCAATTGCGACATGATTGATGTGTGCGAC  
CLYVV-IA-2017 GATCAATTTGTGGCCAGCAAGGTACAGGTTCTAATTGCGACATGATTGATGTGTGCGAC  
\*\* \*\*\*\*\*

CLYVV-IA-2016 AATATACTGGTTTATGTCGCGAGTTACAATGAAGTGGACCAACTCTCAAAGATGTTACTG  
CLYVV-IA-2017 AATATACTGGTTTATGTCGCGAGTTACAATGAAGTGGACCAACTCTCAAAGATGTTACTG  
\*\*\*\*\*

CLYVV-IA-2016 GAGAAGGGATTTCTGGTTACGAAAGTTGATGGAAGAACCATGAAAGGAGGAAAGACTGAG  
CLYVV-IA-2017 GAAAAAGGATTTCTGGTTACGAAAGTTGATGGAAGAACCATGAAAGGAGGAAAAACTGAG  
\*\* \* \*\*\*\*\*

CLYVV-IA-2016 ATTGAGACGAGGGGAACAAAAGCAAGGAAGCATTTCGTTGTGCGCAACAAACATCATAGAG  
CLYVV-IA-2017 ATTGAGACGAGGGGAACAAAAGCAAGGAAGCATTTCGTTGTGCGCAACAAACATCATAGAG  
\*\*\*\*\*

CLYVV-IA-2016 AATGGAGTGACACTTGACATAGAGGGTGTGTAGACTTTGGGTTAAAGGTCGTTCTCTGAG  
CLYVV-IA-2017 AATGGAGTGACACTTGATATAGAGGGTGTGTAGACTTTGGGTTAAAGGTCGTTCTCTGAG  
\*\*\*\*\*

CLYVV-IA-2016 TTAGACGCGGATAGCAGAGTGATGCGCTATTCCAAGCACAGAGTCTCATTTGGTGAGAGG  
CLYVV-IA-2017 TTGGACGCGGATAGCAGAGTGATGCGCTATTCCAAGCACAGAGTCTCATTTGGTGAGAGG  
\*\* \*\*\*\*\*

CLYVV-IA-2016 ATTCAGAGAATCGGAAGAGTTGGTAGGCACAAAGCTGGTAAAGCACTCAAAATTGGAACA  
CLYVV-IA-2017 ATTCAGAGAATCGGAAGAGTTGGTAGGCACAAAGCTGGTAAAGCACTCAAAATTGGAACA  
\*\*\*\*\*

CLYVV-IA-2016 ACAGAGAGGAACCTTCAAAAGATCCCAGAGTTGGTTGCTACAGAGGCAGCATTCTACTGC  
CLYVV-IA-2017 ACAGAGAGGAACCTTCAAAAGATCCCAGAGTTGGTTGCTACAGAGGCAGCATTCTACTGC  
\*\*\*\*\*

CLYVV-IA-2016 TTTGCGTACGGACTTCCAGTTATGTCTGAGGGGTCTCATCCAACATGCTGAGTAAATGC  
CLYVV-IA-2017 TTTGCGTACGGACTTCCAGTTATGTCTGAGGGAGTCTCATCCAACATGCTGAGTAAATGC  
\*\*\*\*\*

CLYVV-IA-2016 ACAGTGCCACAAGCAAAGACCATGATGAGTTTTGAGCTACCAATCATGTACACAGTTAAC  
CLYVV-IA-2017 ACAGTGCCCAAGCAAAGACCATGATGAGCTTTGAGTTACCAATCATGTACACAGTTAAC  
\*\*\*\*\*

CLYVV-IA-2016 TTGGTGAGGTTTGACGGTTCAATGCATCCATCCATACACGAGTTGCTTAAACCATAACAAG  
CLYVV-IA-2017 TTGGTGAGGTTTGACGGTTCAATGCATCCATCCATACATGAGTTGCTTAAACCATAACAAG  
\*\*\*\*\*

CLYVV-IA-2016 CTGAGGGACTCGAATGTGTTCTAAACAAAATGGCTATACCACATGGGAATGTCAAGAAC  
CLYVV-IA-2017 CTGAGGGACTCGAATGTGTTCTAAACAAAATGGCTATACCACATGGGAATGTCAAGAAC  
\*\*\*\*\*

CLYVV-IA-2016 TGGATTTCCGGTCAGAGAGCTCAAGTATGTTGGTGTGAGAATTGACATTCAGAGGACATC  
CLYVV-IA-2017 TGGATTCAGTCAGAGAGCTCAAGTATGTTGGTGTGAGAATTGACATTCAGAGAAGACATC  
\*\*\*\*\*

CLYVV-IA-2016 CGGGTACCCTTCCATGCCAGAGACATACCGGACAAGTTACATGAAAGAATTTTGAGGCC  
CLYVV-IA-2017 CGGGTACCCTTCCATGCCAGAGACATACCGGACAAGTTACATGAAAGAATTTTGAGGCC  
\*\*\*\*\*

CLYVV-IA-2016 TGCTTGAAACACAAGGGAGATGCAGGTTTTGGCAGACTAAGCGTAGTTAGCGCATGTAAG  
CLYVV-IA-2017 TGCTTGAAACACAAGGGAGATGCAGGTTTTGGCAGACTAAGCGTAGTTAGTGCCTGTAAG  
\*\*\*\*\*

CLYVV-IA-2016 GTGGCTTATACTTTGCAAACCTGACCCTACATCATTACAAAGAACAATCAAGATTCTGGAT  
CLYVV-IA-2017 GTGGCTTATACTTTGCAAACCTGATCCTACATCACTACAAAGAACAATCAAGATTCTGGAT  
\*\*\*\*\*

CLYVV-IA-2016 GAGTTGATAGCAAGAGAACAAGAAAGAGAGAGTACTTCCAGAGTGCTTCAAACACAGCT  
CLYVV-IA-2017 GAGTTGATAGCAAGAGAACAAGAAAGAGAGAGTACTTCCAGAGTGCTTCAAACACAGCT  
\*\*\*\*\*

CLYVV-IA-2016 TGCTCTGGTTCCAGTTACTCCTTGACAAGCATCATCAATGCTATTAAGGCACGTAACACT  
CLYVV-IA-2017 TGCTCTGGTTCAAGTTACTCCTTGACAAGCATCATCAATGCTATTAAGGCACGTAACACT  
\*\*\*\*\*

CLYVV-IA-2016 TGTGATTTCACTCAAGAGAACTTAAGCGTGCTTCATAGTGCCAGGCAGCAATTGATGGAA  
CLYVV-IA-2017 TGTGATTTCACTCAAGAGAACTTAAGCGTACTTCATAGTGCTAGGCAGCAATTGATGGAG  
\*\*\*\*\*

CLYVV-IA-2016 TTCAAGAACATAAATTTGTGATTTTTCAAACCATCAACGCTTGATGAATTTGGTGACTG  
CLYVV-IA-2017 TTCAAAAACATAAATTTGTGATTTTTCAAGACCATCAACGCTTGATGAATTTGGTGACTG  
\*\*\*\*\*

CLYVV-IA-2016 GATTGTTTGCAGTTTGAATCAGCGAGTGAGATAAGCAAGCATTAAAGCTCAAGAATCAC  
CLYVV-IA-2017 GATTGTTTGCAGTTCCAGTCAGCGAGTGAGATAAGCAAGCATTAAAGCTCAAGAATCAC  
\*\*\*\*\*

C1YVV-IA-2016 TGGAATGGATCACTGTTGGCCAAAGATATGCTCATAGCTTTAGGCGTTCTTGGTGGCGGT  
C1YVV-IA-2017 TGGAATGGATCACTGTTGGCCAAAGATATGCTCATAGCTTTAGGCGTTCTTGGTGGCGGT  
\*\*\*\*\*

C1YVV-IA-2016 TGTTGGATGTTGTATACTTATTACAACCAGGAAGTGTCCAAAGAATATAAGTTCCAAGGG  
C1YVV-IA-2017 TGTTGGATGTTTATACTTACTACAACCAGGAAGTGTCCAAAGAATATAAGTTCCAAGGG  
\*\*\*\*\*

C1YVV-IA-2016 AAAAGCAAGAGAACAAGACAAAAGTTGAAGTTCAGAGCGGCGAGAGACATGAAGGATCGT  
C1YVV-IA-2017 AAAAGTAAGAGAACAAGACAAAAGTTGAAGTTCAGAGCGGCAAGAGACATGAAGGATCGT  
\*\*\*\*\*

C1YVV-IA-2016 TATGAAGTGCATGCCGATGAGGGACTTTAGTGGAGAATTTTGGAACTCGTTATTCAAAG  
C1YVV-IA-2017 TATGAAGTGCATGCCGATGAGGGACTTTAGTGGAAAATTTTGGAACTCGTTATTCAAAG  
\*\*\*\*\*

C1YVV-IA-2016 AAAGGCAAGACAAAAGGCACTGTTGTGGGTTTGGGTGCAAAAACAAGACGGTTTACTAAC  
C1YVV-IA-2017 AAAGGCAAGACAAAAGGCACTGTTGTGGGTTTGGGTGCAAAAACAAGACGGTTCCTAAC  
\*\*\*\*\*

C1YVV-IA-2016 ATGTATGGTTTTGACCCACGGAGTATTCATTTGCTAGGTATCTTGATCCAATCACGGGT  
C1YVV-IA-2017 ATGTATGGTTTTGACCCACGGAGTACTCATTTGCTAGGTATCTTGATCCAATTACGGGA  
\*\*\*\*\*

C1YVV-IA-2016 GCAACATTGGATGAAACCCCAATTCACAATGTAAATTTGGTTGCTGAGCATTGCGCGAC  
C1YVV-IA-2017 GCAACATTGGATGAAACTCCAATCCACAATGTAAATTTGGTTGCTGAGCATTGCGTGAC  
\*\*\*\*\*

C1YVV-IA-2016 ATAAGGCTTGACATGGTTGACAGGGAGTTACTTGACAAAACAGCACTTATACCTCAAGAGA  
C1YVV-IA-2017 ATAAGGCTTGATATGGTTGACAAGGAGTTACTTGACAAAACAGCACTTATACCTCAAGAGA  
\*\*\*\*\*

C1YVV-IA-2016 CCAATAGAATGTTACTTTGTAAAGGATGCTGGTCAGAAGGTGATGAGGATTGATCTAACA  
C1YVV-IA-2017 CCAATAGAATGTTACTTTGTAAAGGATGCCGGTCAGAAGGTGATGAGGATTGATCTGACA  
\*\*\*\*\*

C1YVV-IA-2016 CCCCACAACCCATTGTTGGCAAGCGATGTTAGCACACCATAATGGGTTATCCTGAGAGA  
C1YVV-IA-2017 CCCCACAACCCATTGTTGGCAAGCGATGTTAGCACACCATAATGGGTTATCCTGAGAGA  
\*\*\*\*\*

C1YVV-IA-2016 GAAGGTGAACTCCGTCAAACCTGGAAGGCAAGGTTAGTCGACCCATCAGAGTTGCCCGTG  
C1YVV-IA-2017 GAAGGTGAACTCCGTCAAACCTGGAAGGCAAGGTTAGTCGACCCATCAGAGTTGCCCGCG  
\*\*\*\*\*

C1YVV-IA-2016 CGAAATGAGGATATTGATGCAGAGTTTGAAAGTCTAAATCGCATAAGCGGTTTGC GCGAC  
C1YVV-IA-2017 CGGAATGAGGATATTGATGCAGAGTTTGAGAGTCTAAATCGCATAAGTGGTTTGC GCGAC  
\*\* \*\*\*\*\*

C1YVV-IA-2016 TATAATCCCATTTACAAAAATGTTTGCTTGCTAACAAATGAGTCAGAAGGCCATAGAGAG  
C1YVV-IA-2017 TATAATCCCATTTACAAAAATGTTTGCTTGCTAACAAATGAGTCAGAAGGCCATAGAGAG  
\*\*\*\*\*

C1YVV-IA-2016 AAGATGTTTGAATTGGGATGTTGCTCGGTGATCATTACAAATCAACATCTGTTTCAAGAG  
C1YVV-IA-2017 AAGATGTTTGAATTGGATATGTTGCTCGGTGATCATTACAAATCAGCATCTGTTTCAAGAG  
\*\*\*\*\*

C1YVV-IA-2016 AATAATGGGGAGTTGTCAATTCAATCCAAGCATGGCTACTTCAGATGCCGCAACACCACA  
C1YVV-IA-2017 AATAATGGGGAGTTATCAATTCAATCCAAGCATGGCTACTTCAGATGCCGCAACACCACA  
\*\*\*\*\*

C1YVV-IA-2016 AGCTTGAAGATGCTACCTTTGGAGGGACACGACATTTTGTAAATTCAGTTACCAAGGGAT  
C1YVV-IA-2017 AGCTTGAAGATGCTGCTTTGGAGGGACATGACATTTTGTGTTGATTTCAGTTACCAAGGGAC  
\*\*\*\*\*

CLYVV-IA-2016 TTCCAGTGTTTCCACAAAAGATTTCGCTTCAGGGAGCCAAGAGTGGATGACAAAATGTT  
CLYVV-IA-2017 TTCCAGTGTTTCCACAAAAGATTTCGCTTTAGGGAGCCAAGAGTGGATGACAAAATAGTT  
\*\*\*\*\*

CLYVV-IA-2016 TTGGTCAGCACAAATTTCCAGGAAAAGAGCTCCTCGAGCACGGTCTCAGAGTCCAGTAAC  
CLYVV-IA-2017 TTGGTCAGCACAAATTTCCAGGAAAAGAGTTCCTCGAGCACGGTCTCAGAGTCCAGCAAC  
\*\*\*\*\*

CLYVV-IA-2016 ATTTCAAGAGTGCAGTGCAGCAATTTCTACAAGCATTGGATCTCAACAGTGGCAGGACAC  
CLYVV-IA-2017 ATTTCAAGAGTGCAGTGCAGTAATTTCTACAAGCACTGGATCTCAACAGTGGCAGGACAC  
\*\*\*\*\*

CLYVV-IA-2016 TGTGGAAACCCTATGGTTTCGACTAAAGATGGATTTATTGTAGGTATCCACAGTCTTGCT  
CLYVV-IA-2017 TGTGGAAACCCTATGGTTTCAACTAAAGATGGATTTATTGTAGGTATCCACAGTCTTGCT  
\*\*\*\*\*

CLYVV-IA-2016 TCATTGACAGGTGACGTTAACATCTTCACAAGCTTTCGCCCGCAGTTTGAAAACAAATAT  
CLYVV-IA-2017 TCATTGACCGCGATGTTAACATCTTCACAAGTTTTCGCCCGCAGTTTGAGAACAATAT  
\*\*\*\*\* \*\* \*\* \*\*\*\*\*

CLYVV-IA-2016 CTACAGAAGCTCAGTGAACACACATGGTGTAGTGGATGGAAACTAAATCTTGAAAGATT  
CLYVV-IA-2017 CTACAGAAGCTCAGTGAACATACATGGTGTAGTGGATGGAAATTAATCTTGAAAGATT  
\*\*\*\*\*

CLYVV-IA-2016 AGTTGGGGTGAATCAACATTGTGGAGGATGCACCTGAAGAGCCCTTTATTACATCCAAG  
CLYVV-IA-2017 AGTTGGGGTGAATCAACATTGTGGAGGATGCACCTGAAGAGCCCTTTATAACATCCAAG  
\*\*\*\*\*

CLYVV-IA-2016 ATGGCAAGCCTTCTTAGTGATTTGAATTGTTTCATTCCAAGCAAGTGCACAAACCAAGTGG  
CLYVV-IA-2017 ATGGCAAGCCTTCTTAGTGATTTGAATTGTTTCATTCCAAGCAAGTGCACAAACCAAGTGG  
\*\*\*\*\*

CLYVV-IA-2016 TTGTTGAAGGAAGTGAAGGATAATGTGCAGGCAGTAGCTCAGGCCCAAGTGCTTTAGTT  
CLYVV-IA-2017 TTGTTAAAGGAAGTGAAGGATAATGTGCAGGCAGTAGCTCAGGCTCCGAGTGCTTTAGTT  
\*\*\*\*\* \*\*\*\*\* \*

CLYVV-IA-2016 ACAAACATGTAGTGAAGGAAAGTGCACATTGTTTGAAGTGTACTTAGCTAATAATCAG  
CLYVV-IA-2017 ACAAACATGTAGTGAAGGAAAGTGCACATTGTTTGAAGTGTACTTAGCCAATAACCAG  
\*\*\*\*\* \*\* \*

CLYVV-IA-2016 GAGGCAGAGAAATTCCTTAGACCTATGATGGGCTTCTATCAGAAGAGTAGATTGAACAAA  
CLYVV-IA-2017 GAGGCAGAAAATTCCTTAGACCTATGATGGGCTTCTATCAGAAGAGTAGATTGAACAAA  
\*\*\*\*\* \*\*\*\*\*

CLYVV-IA-2016 GAAGCTTATACAAAGGATCTCATGAAATACTCAAAGGTGATTGATGTTGGCTTGTTGAC  
CLYVV-IA-2017 GAAGCTTATATAAAGGATCTCATGAAATACTCGAAGGTGATTGATGTTGGCTTGTTGAC  
\*\*\*\*\* \*\*\*\*\*

CLYVV-IA-2016 ACTGAGAAGTTCGAAAAGGGTTTAACTAAAGTTGAGTGCATGCTAAGACAAAAGGGTTC  
CLYVV-IA-2017 ACTGAGAAGTTCGAAAAGTGTAACTAAAGTTGAGTGCATGCTAAGACAAAAGGGTTC  
\*\*\*\*\* \*\*\*\*\*

CLYVV-IA-2016 ACAAATGCAATTACGTGAACGACGAAGCAGACATCTATGCAGCACTAAATATGAAAGCA  
CLYVV-IA-2017 ACAAATGCAATTACGTGAACGATGAAGCAGACATCTATGCAGCACTAAATATGAAAGCA  
\*\*\*\*\* \*\*\*\*\*

CLYVV-IA-2016 GCTATGGGAGCTTTGTACTCAGGGAAAAGAAAGATCATTTTGAAGGCATGCCAATGGAA  
CLYVV-IA-2017 GCCATGGGAGCTTTGTACTCAGGGAAAAGAAAGATCATTTTGAAGGCATGCCAATGGAA  
\*\* \*\*\*\*\*

CLYVV-IA-2016 GAATTTGCCAAATTCATTAGAGCAAGTTGTGAGCGTCTGTTTCAAGGCATGGGAGTT  
CLYVV-IA-2017 GAATTTGCCAAATTCATTAGAGCAAGTTGTGAGCGTCTGTTTCAAGGCATGGGAGTT  
\*\*\*\*\*



CLYVV-IA-2016 TGG AATGGCTCGTTAAAGGCTGAACTTAGACCACAAGAAAAGGTTTGGCAAACAAGACA  
CLYVV-IA-2017 TGG AATGGCTCTTTAAAGGCTGAACTTAGACCACAAGAAAAGGTTTGGCAAACAAGACA  
\*\*\*\*\*

CLYVV-IA-2016 AGGTCCTTCACAGCAGCACCAGTGGACACATTACTGGCTGGAAAGGTTTGTGTGGATGAT  
CLYVV-IA-2017 AGGTCCTTCACAGCAGCGCCAGTGGACACATTACTGGCTGGAAAGGTTTGTGTGGACGAT  
\*\*\*\*\*

CLYVV-IA-2016 TTCAATAACAAGTTCTACAGTCTCCATCTTGAGATACCCTCCACAGTTGGTATCACCAAA  
CLYVV-IA-2017 TTCAATAACA AATTTCTACAGTCTCCATCTTGAGATACCATCCACAGTTGGTATCACCAAA  
\*\*\*\*\*

CLYVV-IA-2016 TTTTATGGTGGTTGGGATTCAATTGTTGAATAAGCTGCCAGATGGATGGGTGTATTGTGAT  
CLYVV-IA-2017 TTTTATGGTGGTTGGGATTCAATTGTTGAATAAGCTGCCAGATGGATGGGTGTATTGTGAT  
\*\*\*\*\*

CLYVV-IA-2016 GCTGATGGCTCGCAGTTTGATAGTTCCTAACACCATACCTGATAAATTCTGTTCTGAGA  
CLYVV-IA-2017 GCTGATGGCTCGCAGTTTGATAGTTCCTAACACCATACCTGATAAATTCTGTTCTGAGA  
\*\*\*\*\*

CLYVV-IA-2016 CTTGACTGAACTTCATGGAAGAGTGGGATATTGGTGAGGAAATGCTTAAGA AACTTGTAC  
CLYVV-IA-2017 CTTGACTGAACTTCATGGAAGAGTGGGACATTGGTGAGGAGATGCTTAGGA AACTTGTAC  
\*\*\*\*\*

CLYVV-IA-2016 ACAGAGATCATATATACACCAATCTAACACCTGATGGTACAATAATCAAGAAGTTCAAA  
CLYVV-IA-2017 ACAGAGATCATATATACACCAATCTGACACCTGATGGTACAATAATCAAGAAGTTCAAA  
\*\*\*\*\*

CLYVV-IA-2016 GGAAACAACAGTGGACAACCCTCGACAGTTGTCGATAACACACTAATGGTGATAATGGCT  
CLYVV-IA-2017 GGAAACAACAGTGGACAACCCTCGACAGTTGTCGATAACACACTAATGGTGATAATGGCT  
\*\*\*\*\*

CLYVV-IA-2016 ATGTACTATGCAGCAGAAAACTTGGTGTGGAAGGAGATTTAAGCGAGTCCATTGTGTTT  
CLYVV-IA-2017 ATGTACTATGCAGCAGAAAACTTGGTGTGGAAGGAGATTTAAGCGAGTCCATTGTGTTT  
\*\*\*\*\*

CLYVV-IA-2016 TACGCCAATGGTGATGATTTGTTGATAGCAGTGCACCCAAGTCATGAGTGGTATCTAGAC  
CLYVV-IA-2017 TACGCCAATGGTGATGATTTGTTGATAGCAGTGCACCCAAGTCATGAGTGGTATCTAGAC  
\*\*\*\*\*

CLYVV-IA-2016 CAACTTCTACACTTTTCAAAGAGTTGGGTTTGA AACTATGATTTCTCAAGCAGGACAAG  
CLYVV-IA-2017 CAACTTCTACACTTTTCAAAGAGTTGGGCTTGA AACTATGATTTCTCAAGCAGAACAAAG  
\*\*\*\*\*

CLYVV-IA-2016 AATAAAGGAGATCTCTGGTTCATGTCACACTGTGGTATAAAGAAAGAGGGTTTGTGGATT  
CLYVV-IA-2017 AATAAAGGTGATCTCTGGTTCATGTCACACTGTGGTATAAAGAAAGAGGTTTATGGATT  
\*\*\*\*\*

CLYVV-IA-2016 CCCAAGTTGGAGCCAGAAAGAGTAGTCTCAATCCTTGAATGGGATAGAGCGGCAGAGCCT  
CLYVV-IA-2017 CCCAAGTTGGAGCCAGAAAGAGTAGTCTCAATCCTTGAATGGGATAGAGCGGCAGAGCCT  
\*\*\*\*\*

CLYVV-IA-2016 GAACATAGGTTGGAAGCTATTTGTGCATCCATGATCGAAGCTTGGGGTTATGATGACTTG  
CLYVV-IA-2017 GAACATAGGTTGGAAGCTATTTGTGCATCCATGATCGAAGCTTGGGGTTATGATGACTTG  
\*\*\*\*\*

CLYVV-IA-2016 CTCAATCACATACGCAGGTTTTATTTATGGGTTCTTGACCAAGCACCATACAACAGCTC  
CLYVV-IA-2017 CTCAATCACATACGCAGGTTTTATTTATGGGTTCTTGACCAAGCACCATACAAGCAGCTC  
\*\*\*\*\*

CLYVV-IA-2016 AGCGCAGAAGGAAAAGCACCCCTATATCTCAGAAGTTGCGTTGAAGAGTTTGTACTGGG  
CLYVV-IA-2017 AGCGCAGAAGGAAAAGCACCCCTATATCTCAGAAGTTGCTTTGAAGAGTTTGTACTGGG  
\*\*\*\*\*

C1YVV-IA-2016 AAACCAGCTACAAGTTGTGAACTAGAAGTGTACAACAAGATCCATCAAGAGCAGCATGAT  
C1YVV-IA-2017 AAACCAGCTACAAGTTGTGAACTAGAAGTTTACAATAAGATCCATCAAGAGCAACACGAT  
\*\*\*\*\* \*\*

C1YVV-IA-2016 GAGTTTGATGACAGCCAGATGAAATTTGTTTTCCAATCCGACAAAGAAAAGTTGAATGCT  
C1YVV-IA-2017 GAGTTTGATGACAGCCAGATGAAATTTGTTTTCCAATCCGACAAAGAGAAGTTGAATGCT  
\*\*\*\*\*

C1YVV-IA-2016 GGTGAGCAACAAAAGTCAAAGGATAAGGAATCAAGACAAAGAGATCAAGAGGGTGAAAAC  
C1YVV-IA-2017 GGTGAGCAACAAAAGTCAAAGGATAAGGAATCAAGACAAAGAGATCAAGAGGGTGAAAAC  
\*\*\*\*\*

C1YVV-IA-2016 TCAACAGACAAATCATTCAGACAGAGACATCAATGCAGGCACCACTGGGACTTTTTCA  
C1YVV-IA-2017 TCGAACAGACAAATCATTCAGACAGAGACATCAATGCAGGAACCACTGGGACTTTTTCA  
\*\* \*\*\*\*\*

C1YVV-IA-2016 GTACCCAAATTGAAGAAAATATCAGGAAAGCTCTCATTGCCCAAAATCAAAGGAAAAGGA  
C1YVV-IA-2017 GTACCCAAATTGAAGAAAATATCAGGAAAGCCCTCATTGCCCAAAATCAAAGGAAAAGGA  
\*\*\*\*\* \*\*

C1YVV-IA-2016 CTGCTGAACTTGGACCATTTGTTAGTTTATGTTCCAAACCAAGACGACATCTCTAACAC  
C1YVV-IA-2017 CTGCTAAATCTGGACCATTTGTTAGTTTATGTTCCAAACCAAGATGACATCTCTAACAC  
\*\*\*\*\* \*\* \*\*\*\*\*

C1YVV-IA-2016 ATAGCAACTCAAGAGCAGCTGGAAGCGTGGCATGAAGGAGTCAAGAATGCGTATGAAGTG  
C1YVV-IA-2017 ATAGCAACTCAAGAGCAGCTAGAAGCGTGGCATGAAGGAGTTAAGAATGCGTATGAGGTG  
\*\*\*\*\* \*\*

C1YVV-IA-2016 GATGATCAACAAATGGAATCATATGCAATGGATTGATGGTGTGGTGCATAGAAAATGGC  
C1YVV-IA-2017 GATGATCAGCAAATGGAATCATATGCAATGGATTGATGGTGTGGTGCATAGAGAATGGC  
\*\*\*\*\*

C1YVV-IA-2016 ACGTCAGGTGATCTTCAAGGTGAGTGGACAATGATGGATGGAGACAAACAGGTAACATTC  
C1YVV-IA-2017 ACGTCAGGTGATCTTCAAGGTGAGTGGACAATGATGGATGGAGAGAAACAGGTAACATTC  
\*\*\*\*\*

C1YVV-IA-2016 CCACCTAAGCCAATTTCTTGACTTTGCCAAACCAACATTTAGGCAGATTATGGCCACTTT  
C1YVV-IA-2017 CCACCTAAGCCAATTTCTTGACTTTGCCAAACCAACATTTAGGCAGATTATGGCCACTTT  
\*\*\*\*\*

C1YVV-IA-2016 TCCCAGGCAGCCGAATCATACATAGAGTTTAGGAACTCAACAGAGAAAATATATGCCTAGG  
C1YVV-IA-2017 TCCCAGGCAGCCGAATCATACATAGAGTTTAGGAACTCAACAGAGAGATACATGCCTAGG  
\*\*\*\*\* \*\*

C1YVV-IA-2016 TATGGGCTGCAAAGAAATCTCACAGACTATGGATTGGCCAGATATGCATTTGACTTCTAC  
C1YVV-IA-2017 TATGGACTGCAAAGAAATCTCACAGACTATGGATTGGCCAGATATGCATTTGACTTCTAC  
\*\*\*\*\*

C1YVV-IA-2016 AGGTTGACCTCAAAGACACCAGCAAGAGCTCGAGAAGCACATATGCAAATGAAGGCAGCA  
C1YVV-IA-2017 AGGTTGACCTCAAAGACACCAGCAAGAGCTCGAGAAGCACATATGCAAATGAAGGCAGCA  
\*\*\*\*\*

C1YVV-IA-2016 GCAATAAGAGGAAAGTCAAACCACATGTTTGGACTGGATGGCAATGTTGGAACAGACGAG  
C1YVV-IA-2017 GCAATAAGAGGAAAGTCAAACCACATGTTTGGACTGGATGGCAATGTTGGAACAGACGAG  
\*\*\*\*\*

C1YVV-IA-2016 GAGAACACAGAAAGGCACACAGCAAATGATGTCAACAGGAACATGCATCACATTGCTGGA  
C1YVV-IA-2017 GAGAACACAGAAAGGCACACAGCAAATGATGTCAACAGGAACATGCATCACATTGCTGGA  
\*\*\*\*\*

C1YVV-IA-2016 GCGCGATTCTAGAGTATCCGTCTTTAAATTCTCCGTTAATTTCGAAGTTTTACTATATA  
C1YVV-IA-2017 GCGCGATTCTAGAGTATCCGTCTTTAAATTCTCCGTTAATTTCGAAGTTTTACTATATA  
\*\*\*\*\*

C1YVV-IA-2016 GCACTATGTTAAGTGAGGTTTTACCTCCATTTTCATTTTAAGTATAATATGTAATCCATTC  
C1YVV-IA-2017 GCACTATGTTAAGTGAGGTTTTACCTCCATTTTCATTTTAAGTATAATATGTAATCCATTC  
\*\*\*\*\*

C1YVV-IA-2016 TCTCTATTCTGACAGAGTAGCTAAGTGAGGTTATACCTCGTTGTGAATCTGATCTTTATA  
C1YVV-IA-2017 TCTCTATTCTGACAGAGTAACTAAGTGAGGTTATACCTCGTTGTGAATCTGATCTTTATA  
\*\*\*\*\*

C1YVV-IA-2016 GAGCGAGAAA-----  
C1YVV-IA-2017 GAGCGAGAAAAAATAAAAAATAAATAAAAAATCAACCCTTTTTTGTAAATCCCCACCTTT  
\*\*\*\*\*

C1YVV-IA-2016 -----  
C1YVV-IA-2017 TGTTCTGCT
